## CORRECTION

# The Notch meeting: an odyssey from structure to function

Ajay Chitnis and Laure Bally-Cuif

There was an error published in *Development* **143**, 547-553.

The name of the second author was spelt incorrectly. This error has now been corrected in the print, online and PDF versions of the paper.

We apologise to the authors for this mistake.
